# Supplementary material for: Brief communication: Conventional assumptions involving the speed of radar waves in snow introduce systematic underestimates to sea ice thickness and seasonal growth rate estimates
Source: Copernicus journal article supplement (doi:10.5194/tc-14-251-2020), 2020-01-27
Supplement: Supplementary file 1 [file tc-14-251-2020-supplement.pdf]

Supplement of The Cryosphere, 14, 251–260, 2020  
<https://doi.org/10.5194/tc-14-251-2020-supplement>  
© Author(s) 2020. This work is distributed under  
the Creative Commons Attribution 4.0 License.

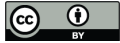

*Supplement of*

**Brief communication: Conventional assumptions involving the speed of radar waves in snow introduce systematic underestimates to sea ice thickness and seasonal growth rate estimates**

**Robbie D. C. Mallett et al.**

*Correspondence to:* Robbie D. C. Mallett ([robbie.mallett.17@ucl.ac.uk](mailto:robbie.mallett.17@ucl.ac.uk))

The copyright of individual parts of the supplement might differ from the CC BY 4.0 License.

## S1 The Comparable Impacts on SIT of Snow Loading and Slower Radar Wave Propagation in Snow

$$\text{Ice Freeboard} = \text{Radar Freeboard} + \text{Propagation Correction} \quad (\text{Armitage and Ridout, 2015}) \quad (\text{S1})$$

$$h_i = h_r + h_s(c/c_s - 1) \quad (\text{S2})$$

5 The conversion of a given ice freeboard can be combined with a snow depth to estimate sea ice thickness:

$$SIT = h_i \frac{\rho_w}{\rho_w - \rho_i} + h_s \frac{\rho_s}{\rho_w - \rho_i} \quad (\text{Tilling et al. 2018}) \quad (\text{S3})$$

Substituting Eq. (S2) into Eq. (S3)

$$SIT = h_r \frac{\rho_w}{\rho_w - \rho_i} + h_s \frac{\rho_w}{\rho_w - \rho_i} \left[ \frac{c}{c_s} - 1 \right] + h_s \frac{\rho_s}{\rho_w - \rho_i} \quad (\text{S4})$$

$$10 \text{ Sea Ice Thickness} = \text{Radar Freeboard Component} + \text{Propagation Correction} + \text{Snow Loading} \quad (\text{S5})$$

Comparing the relative impacts of the Propagation Correction term and Snow Loading term is relatively simple given they share a common factor of  $h_s/(\rho_w - \rho_s)$ . The ratio of the two terms is therefore  $c/c_s - 1$  to  $\rho_s/\rho_w$ . For a typical snow density of  $300 \text{ kg m}^{-3}$ , this ratio is 0.25 to 0.29. (Using  $\rho_w = 1023.9$  and Ulaby et al. (1986) to relate  $\rho_s$  to  $c_s$ )

## S2 Supplementary Figures

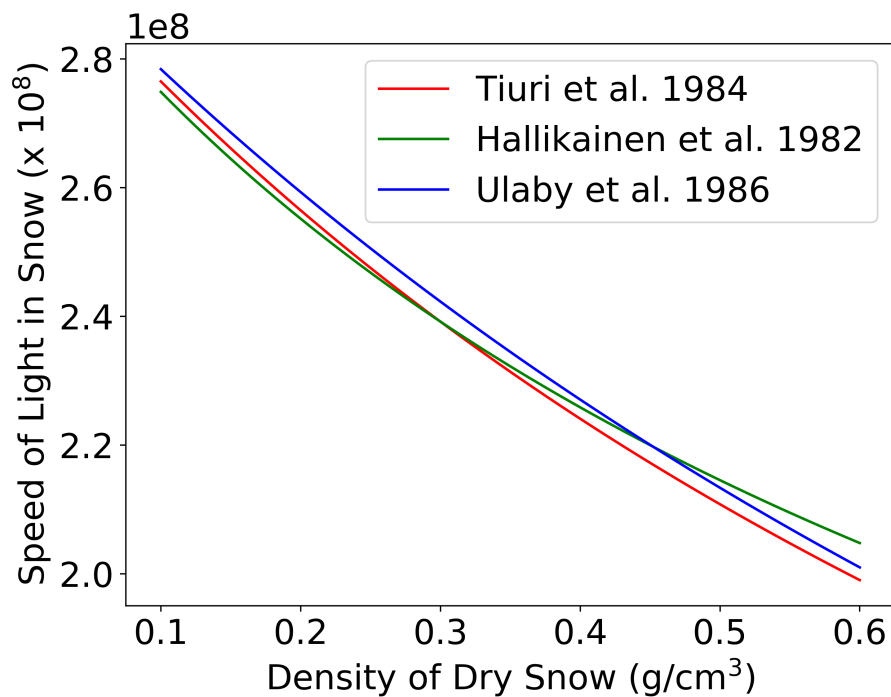

**Figure S1.** Three commonly used relationships between radar wave speed and snow density Hallikainen et al. (1982); Tiuri et al. (1984); Ulaby et al. (1986).

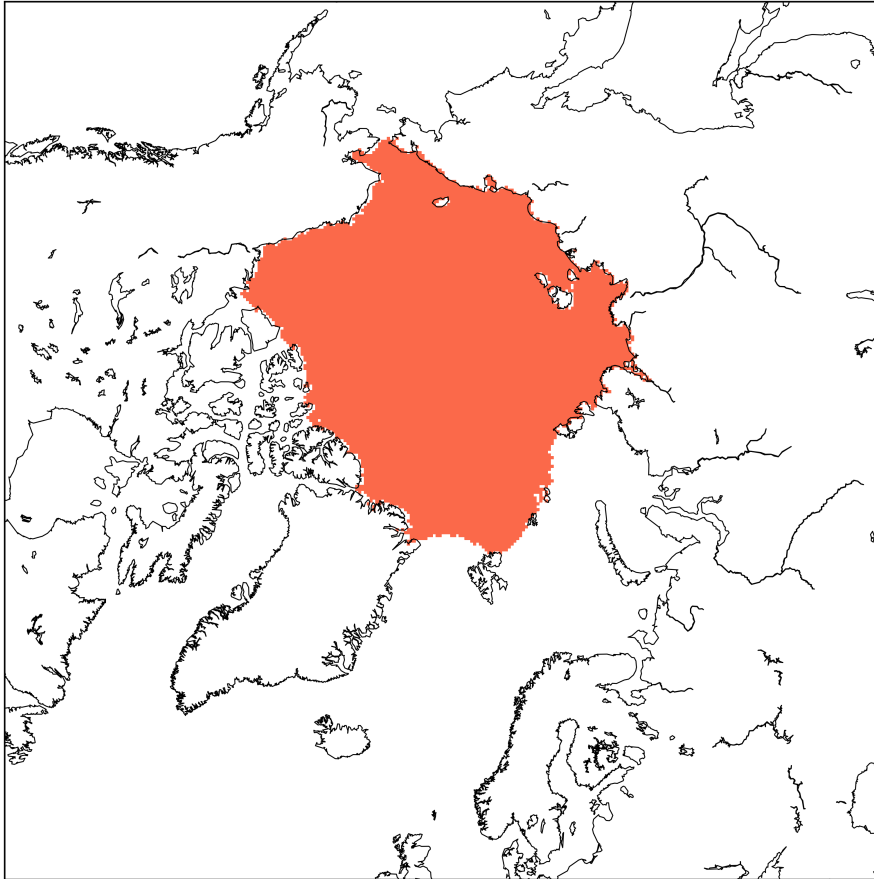

**Figure S2.** The region over which snow depths published in Warren et al. (1999) are generally considered reliable (Laxon et al. (2013); Kwok and Cunningham (2015)), and over which freeboards are considered in this study.

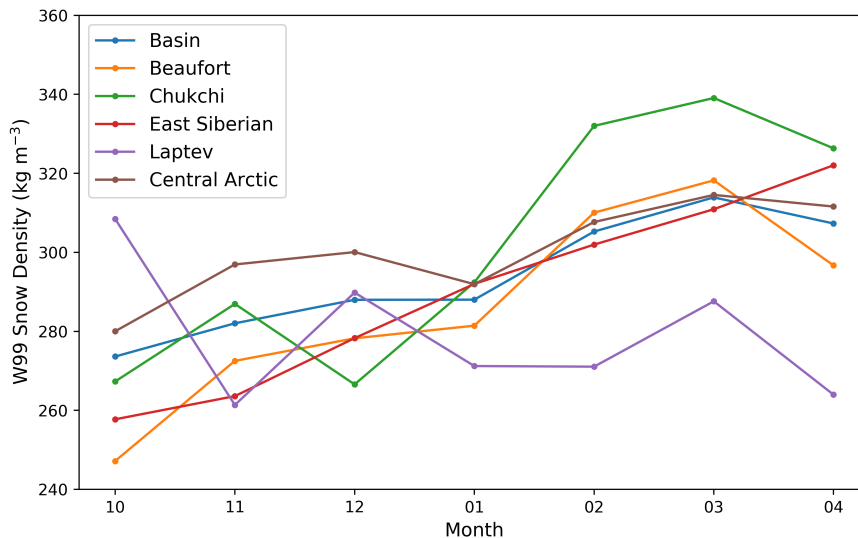

**Figure S3.** Winter snow densification rates for five regions and the basin-wide average. We defined the ‘basin-wide area’ as the shaded area in Fig. (S2). We found the basin-wide densification rate to be roughly representative of its constituent regions apart from the Laptev, which exhibited a small but positive densification.

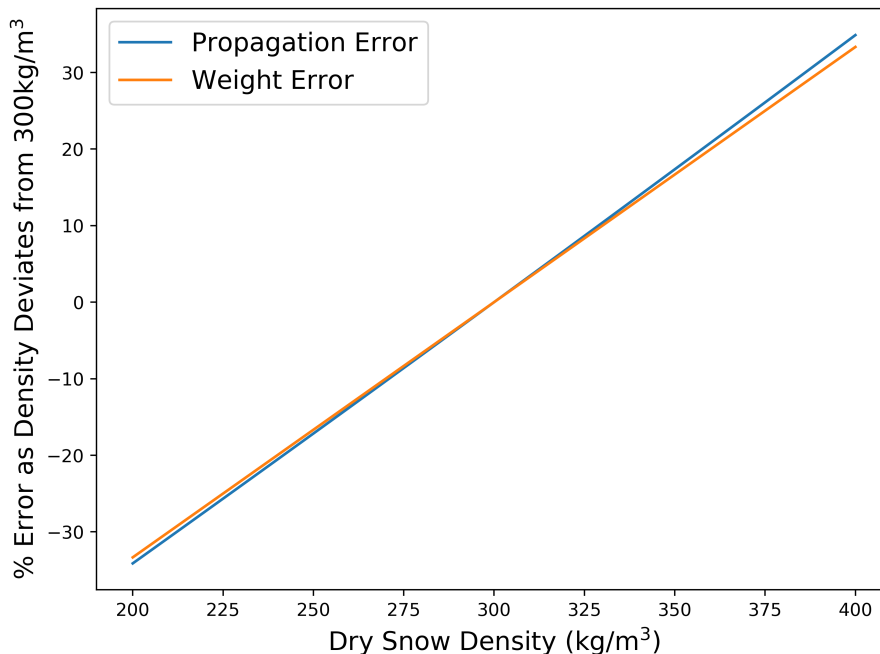

**Figure S4.** While the functional form and magnitude of expressions for the effect of snow weight and slower radar propagation are different, they have a similar error dependence on snow depth. That is to say, the percentage error introduced to the "weight correction" by snow density uncertainty is the same as that for the "propagation correction".

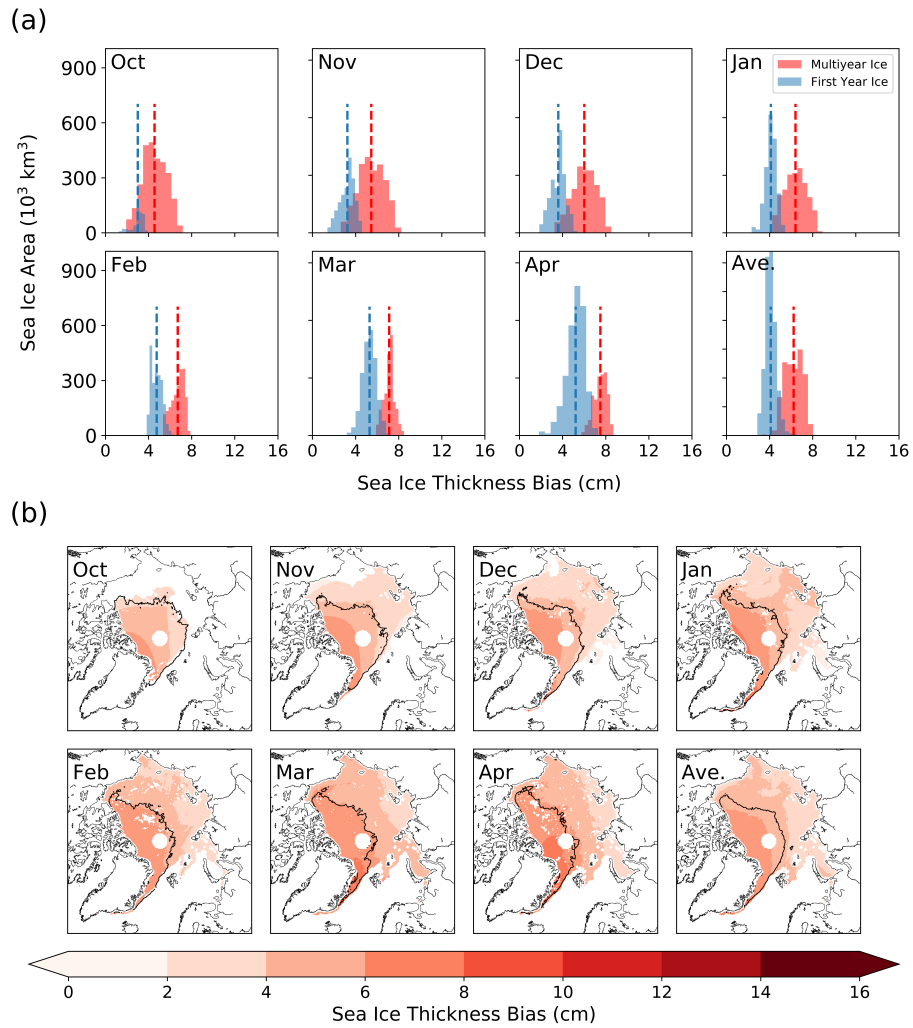

**Figure S5.** Monthly differences in sea ice thickness from the use of  $\delta h = 0.22Z$  and  $\delta h = 0.25Z$  for the propagation by AWI and CPOM respectively.

## 15 References

- Armitage, T. W. and Ridout, A. L.: Arctic sea ice freeboard from AltiKa and comparison with CryoSat-2 and Operation IceBridge, *Geophysical Research Letters*, 42, 6724–6731, 2015.
- Hallikainen, M., Ulaby, F., and Abdel-Razik, M.: Measurements of the dielectric properties of snow in the 4-18 GHz frequency range, in: 1982 12th European Microwave Conference, pp. 151–156, IEEE, 1982.
- 20 Kwok, R. and Cunningham, G.: Variability of Arctic sea ice thickness and volume from CryoSat-2, *Philosophical Transactions of the Royal Society A: Mathematical, Physical and Engineering Sciences*, 373, 20140157, 2015.
- Laxon, S. W., Giles, K. A., Ridout, A. L., Wingham, D. J., Willatt, R., Cullen, R., Kwok, R., Schweiger, A., Zhang, J., Haas, C., et al.: CryoSat-2 estimates of Arctic sea ice thickness and volume, *Geophysical Research Letters*, 40, 732–737, 2013.
- 25 Tilling, R. L., Ridout, A., and Shepherd, A.: Estimating Arctic sea ice thickness and volume using CryoSat-2 radar altimeter data, *Advances in Space Research*, 62, 1203–1225, 2018.
- Tiuri, M., Sihvola, A., Nyfors, E., and Hallikaiken, M.: The complex dielectric constant of snow at microwave frequencies, *IEEE Journal of oceanic Engineering*, 9, 377–382, 1984.
- Ulaby, F. T., Moore, R. K., and Fung, A. K.: *Microwave remote sensing: Active and passive. Volume 3-From theory to applications*, 1986.
- 30 Warren, S. G., Rigor, I. G., Untersteiner, N., Radionov, V. F., Bryazgin, N. N., Aleksandrov, Y. I., and Colony, R.: Snow depth on Arctic sea ice, *Journal of Climate*, 12, 1814–1829, 1999.
